*Novel therapeutic concepts*

# Non-alcoholic fatty liver disease: a new and important cardiovascular risk factor?

Lokpal S. Bhatia<sup>1,2,3\*</sup>, Nicholas P. Curzen<sup>2,3</sup>, Philip C. Calder<sup>1,3</sup>,  
and Christopher D. Byrne<sup>1,3</sup>

<sup>1</sup>National Institute of Health Research Biomedical Research Unit, Southampton University Hospitals NHS Trust, Level D South Academic Block, Southampton General Hospital, Tremona Road, Southampton SO16 6YD, UK; <sup>2</sup>Wessex Cardiothoracic Unit, Southampton University Hospitals NHS Trust, Southampton, UK; and <sup>3</sup>Institute of Developmental Sciences, University of Southampton, Southampton, UK

Received 23 July 2011; revised 14 November 2011; accepted 17 November 2011; online publish-ahead-of-print 8 March 2012

Non-alcoholic fatty liver disease (NAFLD) affects up to a third of the population worldwide and may confer increased cardiometabolic risk with consequent adverse cardiovascular outcomes independent of traditional cardiovascular risk factors and the metabolic syndrome. It is characterized almost universally by insulin resistance and is strongly associated with type 2 diabetes and obesity. Non-alcoholic fatty liver disease is a marker of pathological ectopic fat accumulation combined with a low-grade chronic inflammatory state. This results in several deleterious pathophysiological processes including abnormal glucose, fatty acid and lipoprotein metabolism, increased oxidative stress, deranged adipokine profile, hypercoagulability, endothelial dysfunction, and accelerated progression of atherosclerosis. This ultimately leads to a dysfunctional cardiometabolic phenotype with cardiovascular mortality representing the main mode of premature death in NAFLD. This review is aimed at introducing NAFLD to the clinical cardiologist by discussing in-depth the evidence to date linking NAFLD with cardiovascular disease, reviewing the likely mechanisms underlying this association, as well as summarizing from a cardiologist's perspective, current and potential future treatment options for this increasingly prevalent disease.

**Keywords** Non-alcoholic fatty liver disease • Cardiovascular disease • Insulin resistance • Risk factor • Ectopic fat

## Introduction

The Greek physician Galen considered the liver to be the most essential organ of the human body, stating it was 'the principal instrument of sanguification' in ~200 AD.<sup>1</sup> To today's cardiologist, the liver is viewed mainly as an uncelebrated obstacle to increasing the dose of the ubiquitous statin! However, the role of non-alcoholic fatty liver disease (NAFLD) as a potential independent cardiovascular (CV) risk factor has now gained considerable prominence such that an awareness of this multi-faceted condition is essential for practising cardiologists, given that it affects 20–33% of the general population.<sup>2</sup> As the pathogenesis of the condition is closely linked to insulin resistance (IR), its prevalence parallels that of increasing rates of obesity and type 2 diabetes worldwide, with up to 95% of obese persons and 75% of diabetics likely to have NAFLD,<sup>3</sup> with most cases unrecognized. With this in mind, the potential future burden of NAFLD on public health-care utilization and costs is likely to be significant.<sup>4</sup> As such, the cardiometabolic risk conferred by NAFLD merits increased collaborative study

between diabetologists, hepatologists, and especially cardiologists, given that CV disease appears to largely influence major clinical outcomes in NAFLD.<sup>5–10</sup> This review aims to present to the clinical cardiologist a state-of-the-art summary of the evidence linking NAFLD with CV disease, the potential mechanisms underlying this association, as well as its relation to IR, obesity and the metabolic syndrome (MetS) in the context of increased CV risk.

In preparing this review, Medline was searched for English-language articles including the keywords 'non-alcoholic fatty liver disease' combined with 'cardiovascular disease', 'coronary disease', 'pathogenesis', 'diagnosis', 'treatment' between 1990 and 2010. The bibliographies of identified reports were also explored for additional sources of information.

## Definition of non-alcoholic fatty liver disease

Non-alcoholic fatty liver disease is the most common cause of chronic liver disease in the general population and is present

\* Corresponding author. Tel: +44 2380 777222, ext. 3476, Fax: +44 2380 794730, Email: [loke.bhatia@soton.ac.uk](mailto:loke.bhatia@soton.ac.uk)

Published on behalf of the European Society of Cardiology. All rights reserved. © The Author 2012. For permissions please email: [journals.permissions@oup.com](mailto:journals.permissions@oup.com)

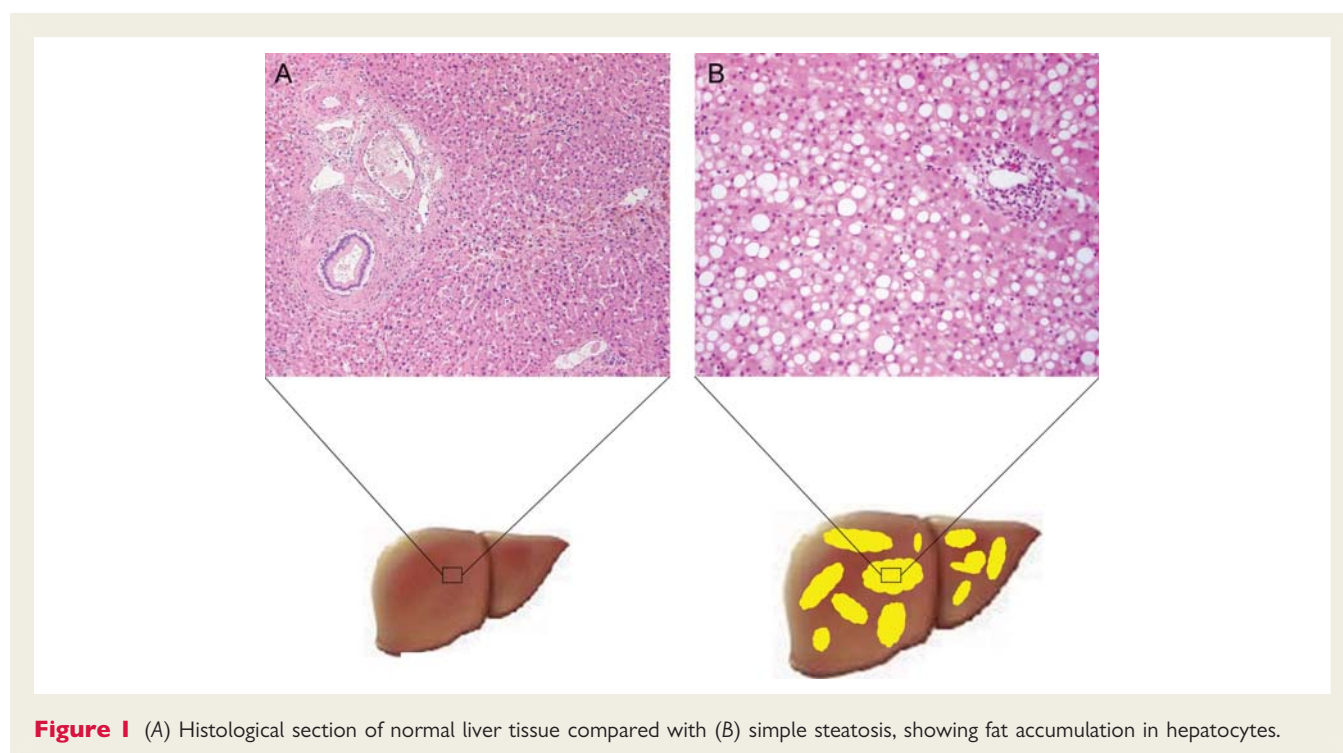

when fatty infiltration affects  $>5\%$  of hepatocytes, in the presence of  $<20$  g (2.5 U) of alcohol consumption per day, without evidence of other causes of liver disease (Figure 1).<sup>11</sup> Non-alcoholic fatty liver disease is a slowly progressive condition and represents a spectrum of varying severity of liver disease, ranging from simple steatosis to co-existent inflammation with hepatocyte ballooning and necrosis, variable grades of fibrosis, and ultimately cirrhosis and an increased risk of hepatocellular carcinoma.<sup>11,12</sup> Non-alcoholic steatohepatitis (NASH) represents the more advanced stages of this disease, i.e. the 'inflammatory' component in addition to steatosis, which carries a higher risk of CV disease and mortality than simple steatosis (Figure 2).<sup>13</sup> Insulin resistance and obesity, both key features of the MetS, are strongly associated with NAFLD progression.<sup>14</sup> The prevalence of NAFLD in subjects with MetS is increased four-fold compared with those without the disease and 30% of NAFLD subjects have MetS.<sup>2</sup> Despite MetS itself conferring an approximate doubling of CV mortality risk,<sup>15</sup> there is still abundant evidence linking NAFLD to increased CV disease risk over and above that associated with the MetS criteria, suggesting that NAFLD *per se* contributes to accelerated atherogenesis.<sup>16</sup>

## Diagnosis of non-alcoholic fatty liver disease

Current laboratory and radiological methods to diagnose NAFLD are either too insensitive or not specific enough to grade disease presence and severity. As the early stages of NAFLD are often asymptomatic, mildly abnormal liver enzymes are usually the only clue pointing to the disease. However, up to 70% of NAFLD patients may have normal liver enzymes,<sup>17</sup> and although alanine

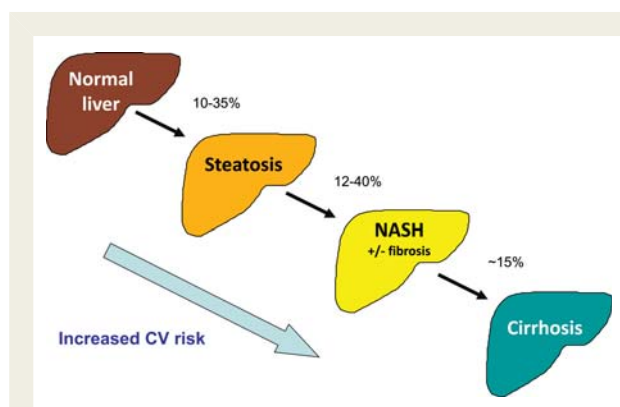

**Figure 2** Variable progression of non-alcoholic fatty liver disease (usually over several years), with different grades of severity in each stage of simple steatosis and non-alcoholic steatohepatitis. These stages are generally reversible, apart from more severe forms of non-alcoholic steatohepatitis + fibrosis. Cardiovascular risk is increased as non-alcoholic fatty liver disease becomes more severe.<sup>3,9,10</sup>

aminotransferase (ALT) levels have shown to be the best single biochemical correlate of hepatic steatosis,<sup>18</sup> they do not distinguish between varying stages of NASH and can be normal in histologically severe disease.<sup>19</sup> Furthermore, ultrasound imaging can only detect steatosis when  $>30\%$  of the liver is affected, but is still recommended as the first-line investigation to 'confirm' the presence of fatty liver due to its widespread availability and low cost.<sup>20</sup> Although magnetic resonance spectroscopy (MRS) has excellent sensitivity in detecting and accurately quantifying hepatic steatosis (Figure 3), none of the non-invasive modalities can detect inflammation

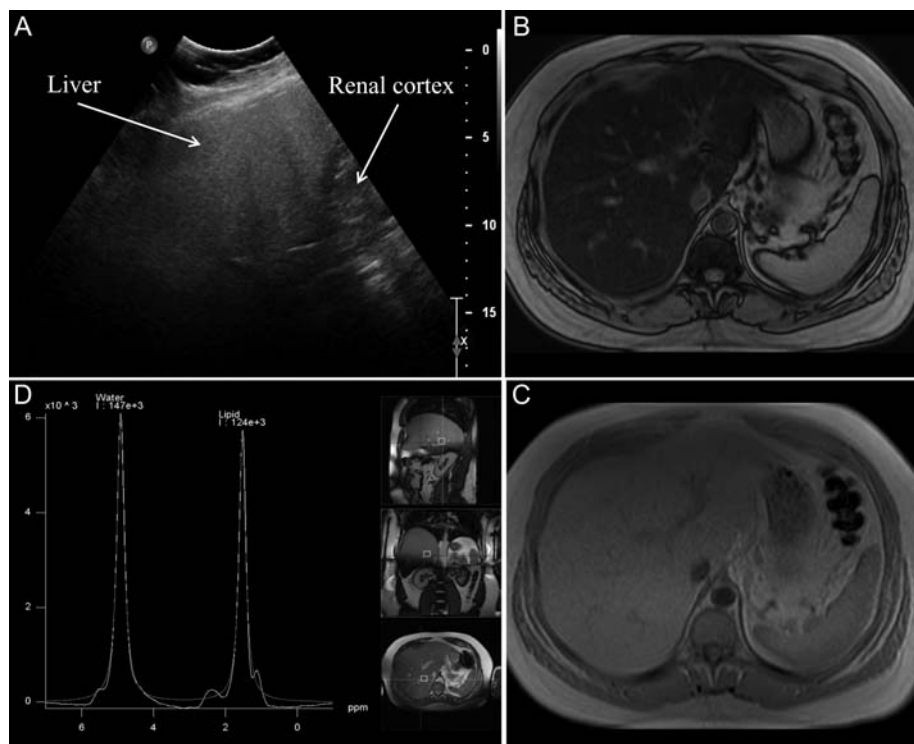

**Figure 3** Liver imaging of a 35-year-old man with severe diffuse hepatic fatty infiltration. (A) Ultrasound scan showing diffuse increased echogenicity of liver parenchyma compared with renal cortex. (B) Chemical shift magnetic resonance imaging showing marked hepatic signal drop-off during out-of-phase image compared with in-phase (C) image, suggesting significant diffuse fatty liver. (D) Single-voxel magnetic resonance spectroscopy measuring area under lipid spectrum (second peak) relative to water spectrum (first peak), allowing accurate quantification of hepatic fat of 85% in the same patient.

and/or fibrosis, i.e. NASH. Consequently, liver biopsy is at present the 'gold-standard' (taking into account potential inaccuracies of sampling variability) for diagnosing NAFLD and staging the degree of NASH and fibrosis by histological assessment, as well as monitoring disease progression.<sup>21</sup> Because of the highly invasive and potentially risky nature of liver biopsy, various algorithms of combined clinical and specialized blood biomarkers, along with advanced imaging methods (e.g. MR/ultrasound elastography) are being developed to allow improved non-invasive detection of disease stage and activity.<sup>20</sup>

## Epidemiology of cardiovascular disease in non-alcoholic fatty liver disease

Numerous epidemiological studies have reported an increased incidence of adverse CV events in NAFLD subjects compared with the general population<sup>5–10,22–29</sup> (Table 1). As NAFLD is the commonest cause of abnormal liver enzymes in developed countries,<sup>20</sup> many epidemiological studies have employed these as biochemical surrogates of NAFLD. Several studies have shown a significant association between increased gamma-glutamyltransferase (GGT) levels and CV mortality over an average median of 12-year follow-

up, even after adjusting for typical CV risk factors and body mass index (BMI).<sup>22–24</sup> Additionally, a meta-analysis of 10 pooled studies confirmed the independent association between elevated GGT and adverse CV events.<sup>25</sup> However, GGT is also expressed in atherosclerotic plaques and has a role in oxidative stress,<sup>30</sup> as well as being associated with all components of the MetS.<sup>31</sup> Alanine aminotransferase has been reported to be more closely related to liver fat content than GGT.<sup>14</sup> Similarly, several large population-based cohort studies have reported an independent association between elevated ALT and CV mortality after adjusting for CV risk factors.<sup>26–28</sup> Importantly, the correlation of raised ALT or GGT with CV disease in these studies may simply reflect their significant association with IR,<sup>32</sup> which is itself a strong risk factor for CV disease, rather than as a marker for the presence or severity of NAFLD.

Employing ultrasound imaging as a more specific diagnostic determinant of NAFLD than liver enzymes, three large community-based prospective cohort studies also documented a significant independent association with CV events<sup>5–7</sup> (Table 1). Of note, Hamaguchi et al.<sup>6</sup> undertook a prospective analysis of 1637 healthy subjects recruited from a health check-up programme, and found 19% with ultrasound evidence of NAFLD. At 5-year follow-up, 5.2% of the NAFLD group suffered an adverse CV event, compared with 1.0% of the non-NAFLD group ( $P < 0.001$ ). By multivariate analysis, the association between NAFLD

**Table 1** Main epidemiological studies relating non-alcoholic fatty liver disease to increased cardiovascular risk

| Authors                                 | Study characteristics [N–O assessment of quality <sup>a</sup> ]                                                                  | Diagnosis of NAFLD                                                      | Main findings                                                                                                       | Risk estimates (95% CI or P-value)                             | Comments/limitations                                                                                                              |
|-----------------------------------------|----------------------------------------------------------------------------------------------------------------------------------|-------------------------------------------------------------------------|---------------------------------------------------------------------------------------------------------------------|----------------------------------------------------------------|-----------------------------------------------------------------------------------------------------------------------------------|
| Ruttmann <i>et al.</i> <sup>22</sup>    | Austrian population-based cohort (n = 163 944), median F/U of 12 years [3,1,3]                                                   | Liver enzymes (GGT)                                                     | CV mortality increased in NAFLD, independent of traditional CV RFs, alcohol and BMI                                 | HR: men 1.66 (1.40–1.98), women 1.64 (1.36–1.97)               | Poor sensitivity of GGT in NAFLD                                                                                                  |
| Wannamethee <i>et al.</i> <sup>23</sup> | British population-based cohort (n = 7613 middle-aged men), median F/U of 11.5 years [3,1,3]                                     | Liver enzymes (GGT)                                                     | Total and CHD mortality increased in NAFLD, independent of CV RFs, alcohol, and BMI                                 | RR: 1.42 (1.12–1.80)                                           | Men-only cohort. Poor sensitivity of GGT in NAFLD                                                                                 |
| Lee <i>et al.</i> <sup>24</sup>         | Finnish population-based cohort (n = 28 838), median F/U of 11.9 years [3,1,3]                                                   | Liver enzymes (GGT)                                                     | CHD mortality and non-fatal MI increased in NAFLD independent of CV RFs and alcohol                                 | HR: men 1.20 (1.10–1.31), women 1.14 (1.03–1.27) <sup>25</sup> | Poor sensitivity of GGT in NAFLD                                                                                                  |
| Fraser <i>et al.</i> <sup>25</sup>      | Meta-analysis of 10 pooled population-based cohort studies <sup>b</sup>                                                          | Liver enzymes (GGT)                                                     | CV events (fatal and non-fatal) increased in NAFLD after adjustment for CV RFs and alcohol                          | HR: 1.34 (1.22–1.48)                                           | Heterogeneity of studies ( $I^2 = 73\%$ ), GGT poor marker of NAFLD                                                               |
| Fraser <i>et al.</i> <sup>25</sup>      | British Women's Heart and Health Study, population-based (n = 2961 older women), median F/U of 4.6 years [3,1,3]                 | Liver enzymes (ALT and GGT)                                             | No independent association between NAFLD and fatal and non-fatal CV events                                          | ALT: HR 0.94 (0.65–1.37), GGT: HR 1.17 (0.93–1.48)             | Women-only cohort, ALT/GGT not sensitive markers of NAFLD, relatively short follow-up                                             |
| Schindhelm <i>et al.</i> <sup>26</sup>  | Hoorn Study, population-based (n = 1439 middle-aged), F/U of 10 years [3,2,2]                                                    | Liver enzymes (ALT)                                                     | Fatal and non-fatal CHD increased in NAFLD, independent of CV and MetS RFs                                          | HR: 1.88 (1.21–2.92)                                           | ALT not a sensitive marker of NAFLD                                                                                               |
| Dunn <i>et al.</i> <sup>27</sup>        | NHANES-III, population-based cohort (n = 7574), mean F/U of 8.7 years [3,1,3]                                                    | Liver enzymes (ALT)                                                     | Total and CV mortality increased in NAFLD but only in 45–54 year age group, independent of CV RFs                   | HR: 8.15 (2.00–33.20)                                          | ALT not a sensitive marker of NAFLD                                                                                               |
| Yun <i>et al.</i> <sup>28</sup>         | Korean population-based cohort (n = 37 085), median F/U of 5 years [3,1,3]                                                       | Liver enzymes (ALT)                                                     | CV or diabetes-related mortality increased in NAFLD, independent of CV RFs, alcohol, BMI, and socio-economic status | RR: 2.26 (1.22–4.19)                                           | ALT not a sensitive marker of NAFLD                                                                                               |
| Targher <i>et al.</i> <sup>5</sup>      | Valpolicella Heart Diabetes Study, community-based diabetic cohort, free of CV disease (n = 2103), mean F/U of 6.5 years [4,2,2] | Liver ultrasound                                                        | Increased fatal and non-fatal CV events in NAFLD, independent of CV RFs, diabetes control, and MetS                 | HR: 1.87 (1.20–2.60)                                           | Exclusive diabetic cohort, liver ultrasound poor sensitivity with liver fat < 30%                                                 |
| Hamaguchi <i>et al.</i> <sup>6</sup>    | Japanese community-based healthy cohort (n = 1637), mean F/U of 5.8 years [4,2,1]                                                | Liver ultrasound                                                        | Increased adverse CV events in NAFLD, independent of CV RFs and MetS                                                | OR: 4.12 (1.58–10.75)                                          | Largely volunteer-reported CV events, 25% lost to F/U, use of ultrasound to diagnose NAFLD                                        |
| Haring <i>et al.</i> <sup>7</sup>       | Study of Health in Pomerania population-based German cohort (n = 4160 middle-aged), median F/U of 7.3 years [3,1,3]              | GGT and liver ultrasound                                                | Increased CV mortality in men with NAFLD and raised GGT (but not women) after adjustment for cardio-metabolic RFs   | HR: men 6.22 (1.22–31.62), women 0.98 (0.11–8.84)              | Significantly older age and increased baseline CV disease in men vs. women, inadequate NAFLD sample size in women → type 2 error? |
| Adams <i>et al.</i> <sup>9</sup>        | Community-based North American cohort (n = 420), mean F/U 7.6 years [3,0,3]                                                      | Majority had liver ultrasound (liver imaging or biopsy in all subjects) | Increased total mortality (mainly CV-related or cancer) in NAFLD compared with matched reference population         | SMR: 1.34 (1.003–1.76)                                         | Liver ultrasound poor sensitivity with liver fat < 30%, wide variability of length of follow-up                                   |

Continued



Table 1 Continued

| Authors                        | Study characteristics [N–O assessment of quality <sup>a</sup> ]                                                       | Diagnosis of NAFLD     | Main findings                                                                                                                                           | Risk estimates (95% CI or P-value) | Comments/limitations                                                                              |
|--------------------------------|-----------------------------------------------------------------------------------------------------------------------|------------------------|---------------------------------------------------------------------------------------------------------------------------------------------------------|------------------------------------|---------------------------------------------------------------------------------------------------|
| Elkstedt et al. <sup>10</sup>  | Swedish hospital-based consecutive biopsy cases (n = 129), mean F/U of 13.7 years [3,0,3]                             | Liver biopsy           | Increased total mortality which was primarily CV-related (only in NASH patients but not in simple steatosis) compared with matched reference population | RR: 1.38 (P = 0.006)               | No diabetes screening at baseline, small sample size (due to liver biopsy as diagnostic modality) |
| Soderberg et al. <sup>8</sup>  | Swedish hospital-based consecutive biopsy cases (n = 118), median F/U of 24 years [3,0,3]                             | Liver biopsy           | Increased total mortality in NAFLD was predominantly CV related, compared with matched reference population                                             | SMR: 1.69 (1.24–2.25)              | Small sample size (due to liver biopsy as diagnostic modality)                                    |
| Schwimmer et al. <sup>29</sup> | Cross-sectional consecutive autopsy biopsy cases of child death (n = 817) from accidental or unnatural causes [3,0,3] | Liver biopsy (autopsy) | Increased coronary and aortic atherosclerosis in NAFLD, independent of obesity                                                                          | OR: 1.80 (P < 0.001)               | Limitations with autopsy studies                                                                  |

NAFLD, non-alcoholic fatty liver disease; F/U, follow-up; GGT, gamma-glutamyltransferase; ALT, alanine aminotransferase; CV, cardiovascular; RFs, risk factors; BMI, body mass index; CHD, coronary heart disease; MI, myocardial infarction; MetS, metabolic syndrome; NASH, non-alcoholic steatohepatitis; CI, confidence interval; HR, hazard ratio; RR, relative risk; OR, odds ratio; SMR, standardized mortality ratio.  
<sup>a</sup>N–O, Newcastle–Ottawa Scale for assessing the quality of non-randomized studies based on study selection (0–4), comparability (0–2), outcome/exposure (0–3).  
<sup>b</sup>Meta-analysis adhered to the Meta-analysis of observational studies in Epidemiology (MOOSE) group standards of reporting.<sup>147</sup>

and future CV events was shown to be independent of the MetS, as well as conventional cardiac risk factors. Although these studies are strongly indicative of NAFLD as a predictor of CV disease independent of diabetic status, they are limited by the lack of sensitivity of ultrasound determination of NAFLD.

Even so, smaller long-term prospective studies in patients with biopsy-proven NAFLD show significantly higher total mortality rates compared with a matched reference population, with CV disease representing the main mode of death, outnumbering cancer- and liver-related mortality.<sup>8,10</sup> Of note, only subjects with NASH rather than simple steatosis had significantly reduced survival, although in one study even subjects with bland steatosis showed a trend to reduced survival (P = 0.06), primarily from CV-related causes over a median follow-up of 24 years.<sup>8</sup> However, these studies are limited by modest sample sizes and inclusion of select cohorts requiring liver biopsy for clinical reasons, which therefore necessitate cautious interpretation of the reported ‘benign’ nature of simple steatosis.

Evidence of association of non-alcoholic fatty liver disease with cardiovascular disease

Cardiovascular risk assessment scores in non-alcoholic fatty liver disease

Given that traditional CV risk factors are commonly prevalent in NAFLD subjects, investigators have applied validated CV risk prediction scores to evaluate the risk profile of NAFLD patients, with most of these studies showing that NAFLD independently confers an increased CV risk score (see Supplementary material online, Table 2).<sup>33–36</sup> One study also documented that high-sensitivity C-reactive protein, a well-established marker of adverse CV outcome, was significantly elevated compared with the non-NAFLD group in both sexes.<sup>34</sup> Additionally, we have recently shown a strong association between histological severity of NAFLD and calculated estimates of CV risk [both QRISK2 and Framingham risk score (FRS)] independently of markers of glucose control and obesity.<sup>37</sup>

Although these global risk prediction studies may help to describe part of the association between NAFLD and increased CV risk, they are flawed by the inherent limitations of using risk scores based on traditional CV risk factor-derived multivariable statistical models to identify at-risk patients.<sup>38</sup> Furthermore, we know that some of the important determinants of NAFLD, such as IR, obesity, and raised triglycerides (TGs), all of which also increase the risk of CV disease, are not generally accounted for in these risk assessment models. Indeed, the FRS is already known to underestimate the risk of CV disease in MetS,<sup>39</sup> which shares many features in common with NAFLD. It might therefore not be appropriate to risk-stratify patients with NAFLD solely based on current CV risk scoring systems. Further research is necessary to determine simple and cost-effective robust biomarkers (or algorithm-based scores) of NAFLD status including its direct cardiometabolic effects, before we can evaluate its added discriminant value when applied to current CV risk prediction models in cohort studies.

## Studies evaluating coronary disease in non-alcoholic fatty liver disease

Coronary artery calcium (CAC) scoring with cardiac computed tomography (CT) is a very sensitive method of demonstrating the presence and extent of coronary atherosclerosis and significantly improving CV risk prediction in asymptomatic individuals beyond traditional risk factor scoring systems.<sup>40</sup> Several studies demonstrate a significantly increased coronary atherosclerotic burden in the presence of NAFLD (see Supplementary material online, Table 3),<sup>41–44</sup> with one study also reporting a significant association between 'vulnerable plaque' and NAFLD in patients undergoing multislice CT for clinical suspicion of coronary artery disease (CAD).<sup>42</sup> This finding is consistent with data showing that NAFLD patients have significantly higher plasma markers of oxidative stress and inflammation, which are in part derived from the diseased liver causing a systemic inflammatory and pro-thrombotic state.<sup>45,46</sup> Furthermore, in the Study of Inherited Risk of Coronary Atherosclerosis (SIRCA) of 860 asymptomatic non-diabetic participants, investigators found that the IR index was a robust and independent predictor of CAC score even after controlling for traditional CV risk factors, MetS, and C-reactive protein.<sup>47</sup>

A strong association between NAFLD and prevalence of significant CAD determined by coronary angiography has also been consistently reported, albeit with variable thresholds of 'significant' CAD between studies (see Supplementary material online, Table 4).<sup>48–51</sup> Although these studies indicate an independent association between NAFLD and increased CAD in terms of angiographic appearance even after adjusting for traditional CV risk factors and components of the MetS, none of them evaluated the functional significance of these coronary lesions. Given that the presence of ischaemia rather than coronary anatomy dictate clinical outcome,<sup>52,53</sup> the significance of these findings in association with NAFLD should not be overestimated.

## Studies evaluating carotid disease in non-alcoholic fatty liver disease

Measurement of carotid intima-media thickness (CIMT) and plaque burden by ultrasound is a well-validated and widely accepted screening tool for the prediction of CV disease in asymptomatic subjects.<sup>54,55</sup> Several studies link NAFLD independently with carotid disease, although a few have described a weaker association after adjusting for MetS (see Supplementary material online, Table 5).<sup>35,56–61</sup> Importantly, severity of histological features of NAFLD appears to correlate independently with increasing CIMT,<sup>58</sup> concordant with epidemiological data documenting NASH patients having a higher CV risk than simple steatosis. Additionally, a systematic review of seven published studies (total of 3497 subjects) reported a significant association between NAFLD and CIMT, showing an estimated increase of 13% in CIMT for NAFLD cases compared with controls. Prevalence of carotid plaque was also more frequent in NAFLD subjects.<sup>62</sup>

However, two subsequent studies not included in this meta-analysis did not show an association between NAFLD and increased CIMT (see Supplementary material online, Table 5).<sup>63,64</sup> Importantly, both were conducted in primarily

diabetic subjects, with one study reporting a majority of their cohort on insulin treatment.<sup>64</sup> Given that insulin therapy is known to decrease liver fat in type 2 diabetics, possibly through reduction in glucose and free fatty acid (FFA) levels,<sup>65</sup> these results must be interpreted with caution. Furthermore, diabetes itself is considered a coronary-risk equivalent and so may have masked the association between NAFLD and carotid disease, especially when analysing relatively small sample sizes. Additionally, neither of these studies evaluated the presence of carotid plaque, which appears to have similar or greater predictive power for CV events than CIMT alone.<sup>66</sup>

## Studies evaluating cardiac function in non-alcoholic fatty liver disease

Studies in subjects with MetS have consistently shown increased left ventricular (LV) mass index and diastolic function impairment when compared with controls, which are in the main secondary to the effects of IR, obesity, and hypertension on cardiac structure and function.<sup>67,68</sup> Only a few studies have focused specifically on NAFLD subjects, and the finding of abnormal LV geometry and diastolic dysfunction has similarly been reported (see Supplementary material online, Table 6).<sup>69–71</sup> One study also demonstrated a strong positive correlation between the degree of diastolic dysfunction and amount of liver fat, with diastolic dysfunction and IR the only independent parameters associated with NAFLD.<sup>70</sup>

Another study reported that echocardiographic measures of coronary flow reserve (CFR) were significantly lower in NAFLD compared with healthy controls, after adjusting for obesity, traditional CV risk factors and the presence of MetS.<sup>72</sup> Just under half of NAFLD patients had an impaired CFR, whereas all controls had normal CFR values, and histological liver fibrosis score was the only independent predictor of impaired CFR. Although they correctly postulated that this result likely reflects impaired coronary endothelial function in the NAFLD group, they were unable to exclude the possibility of these patients having asymptomatic epicardial CAD. The consistent finding of subclinical cardiac dysfunction in an asymptomatic population with NAFLD is perhaps not surprising, given that LV dysfunction and LV mass are strongly correlated with IR, as well as subsequent prognosis.<sup>73</sup>

## Studies evaluating endothelial dysfunction and myocardial metabolism in non-alcoholic fatty liver disease

Endothelial dysfunction is now recognized as the earliest detectable component in the development of atherosclerosis. In both diabetic and non-diabetic cohorts, studies have shown an independent association between impaired endothelium-dependent flow-mediated dilation (FMD) and NAFLD.<sup>36,74</sup> In addition, lower FMD was observed in NASH compared with simple steatosis, again confirming the graded association of CV risk with severity of NAFLD.<sup>36</sup>

To gain further insight on the causes of subclinical cardiac dysfunction in NAFLD, the effects of hepatic steatosis on myocardial metabolism have also been examined.<sup>75,76</sup> One study found a novel positive association between hepatic fat content and myocardial IR. Patients with high liver fat content not only showed significantly

lower whole-body insulin sensitivity as expected, but also reduced myocardial glucose uptake and extraction rate, reduced CFR, and increased plasma levels of inflammatory markers and vascular adhesion molecules. Only liver fat content remained significantly associated with impaired myocardial metabolism even after adjusting for IR, visceral fat mass, and other important variables.<sup>75</sup> Another study assessed myocardial energy metabolism in NAFLD, utilizing <sup>31</sup>P-MRS to determine the ratio of phosphocreatine to ATP in a young, healthy cohort.<sup>76</sup> The authors reported significantly impaired LV energy metabolism as well as increased epicardial fat in NAFLD compared with controls. This was despite normal LV morphological features and systolic/diastolic function in both groups, and was independent of usual CV risk factors. This suggests that in patients with hepatic steatosis, abnormalities in myocardial metabolism may precede functional and structural cardiac remodelling, leading to increased LV mass and diastolic dysfunction.

The precipitating factor for this dysfunctional cardiac phenotype appears to be the development of systemic and hepatic IR, leading to hyperinsulinaemia and increased FFA availability with associated myocardial IR. This produces inefficient energy metabolism by cardiomyocytes, switching to fat rather than glucose oxidation in physiologically demanding states, and yielding less ATP per oxygen molecule consumed. With progressive workload placing the heart under increasing strain, this potentiates myocardial dysfunction ultimately leading to myocardial adaptive remodelling and myocardial injury. The excess FFA supply also leads to cardiac lipotoxicity by causing intracellular lipid accumulation and overwhelming normal cardiomyocyte oxidative capacity, resulting in increased oxidative stress and consequent cardiac apoptosis and dysfunction.<sup>73,77</sup>

## Pathogenesis of cardiovascular disease in non-alcoholic fatty liver disease

### Insulin resistance

The majority of the above studies point to an independent link between NAFLD and increased CV risk or adverse CV outcome. However, there is considerable heterogeneity in these studies in terms of outcomes measured as well as confounding variables not adequately adjusted for, but most importantly, in the method of NAFLD diagnosis and quantification of severity of NAFLD. This appears to be of paramount importance due to the disparate pathophysiological and metabolic consequences of the various stages of simple steatosis and NASH, both strongly linked to hepatic and peripheral IR. In fact, liver fat content appears to be the best independent predictor of IR in skeletal muscle, adipose tissue, and the liver.<sup>78</sup> Similarly, adverse CV outcome is likely to be associated with liver fat/inflammation in a monotonic relationship, progressively increasing with more advanced stages of NAFLD.<sup>58,70</sup> This parallels epidemiologic evidence showing a progressive relationship between glucose levels and CV disease extending from well below the diabetic threshold.<sup>79</sup> Ultimately, the development and progression of IR appears to be the key

mediator in the initiation and propagation of NAFLD, primarily through adverse changes in glucose, fatty acid, and lipoprotein metabolism, with both conditions subsequently driving each other in a synergistic fashion. Alterations in cellular FFA transport, possibly through hyperinsulinaemia, are involved in the pathogenesis of ectopic fat distribution by diverting the accumulation of TG away from adipose tissue and towards other key metabolic organs, such as skeletal muscle and liver. This results in impaired insulin signalling in these tissues, and further exacerbates IR and the consequent cardiometabolic dysfunctional cascade.<sup>80</sup> These processes are also exacerbated by associated subclinical inflammation, deranged adipokines, and increased ectopic fat accumulation in other organs including the heart, all ultimately contributing to increased CV risk (Figure 4).

### Visceral fat

Visceral adipose tissue (VAT) appears to have a strong independent positive correlation with liver fat.<sup>18</sup> This is not surprising given that plasma FFAs appear to be the main source of hepatic TGs in NAFLD, arising in part by greater lipolysis from insulin-resistant adipose tissue. This helps to explain somewhat the close association between the MetS and NAFLD, in that increased waist circumference is a mandatory criteria in the International Diabetes Federation guidelines for diagnosing MetS. Additionally, the independent link between centrally obese individuals and increased CV morbidity and mortality is well established.<sup>81</sup> Therefore, could VAT itself explain the increased CV risk seen with NAFLD, rather than liver fat content *per se*?

Studies show that increased VAT mass is independently associated with impaired glucose tolerance, IR, and dyslipidaemia, conferring an increased risk of CV disease, irrespective of diabetic status.<sup>82</sup> Furthermore, the 'portal hypothesis' suggests that increased VAT lipolysis secondary to IR leads to an elevated flux of FFAs into the portal vein for direct transport to the liver, resulting in increased hepatic fat, which would suggest that visceral fat is an important mediator of liver fat content.<sup>83</sup> In fact, in the Quebec Cardiovascular Study, elevated FFA levels yielded a two-fold increase in the risk of ischaemic heart disease, regardless of the presence of diabetes.<sup>84</sup> Additionally, high FFA concentrations in patients with angiographic CAD independently predicted CV mortality.<sup>85</sup> Apart from being a fat-storage organ, visceral fat is also metabolically active, secreting several adipokines, cytokines, and hormones that serve to regulate inflammation, liver fat, IR, and modify CV disease outcome (see Supplementary material online, Table 7).<sup>12,77,86–95</sup> Importantly, obesity in certain situations represents a chronic low-grade systemic inflammatory state that contributes to vasculopathy and CV risk through the release of these proinflammatory and atherogenic bioactive molecules.<sup>96</sup>

However, the mechanisms linking visceral fat or obesity to CV disease are strongly related to IR, which itself is robustly associated with CV risk and atherosclerosis, already reviewed in detail.<sup>97</sup> It is therefore unclear whether VAT actually confers direct CV risk through secreted factors, or indirectly via IR-related processes, or both. Importantly, studies from patients with lipodystrophy suggest that even with little or no adipose tissue, fatty liver, and IR can still develop quite markedly,<sup>98</sup> which undermines the portal hypothesis. Epidemiological and case-control studies also

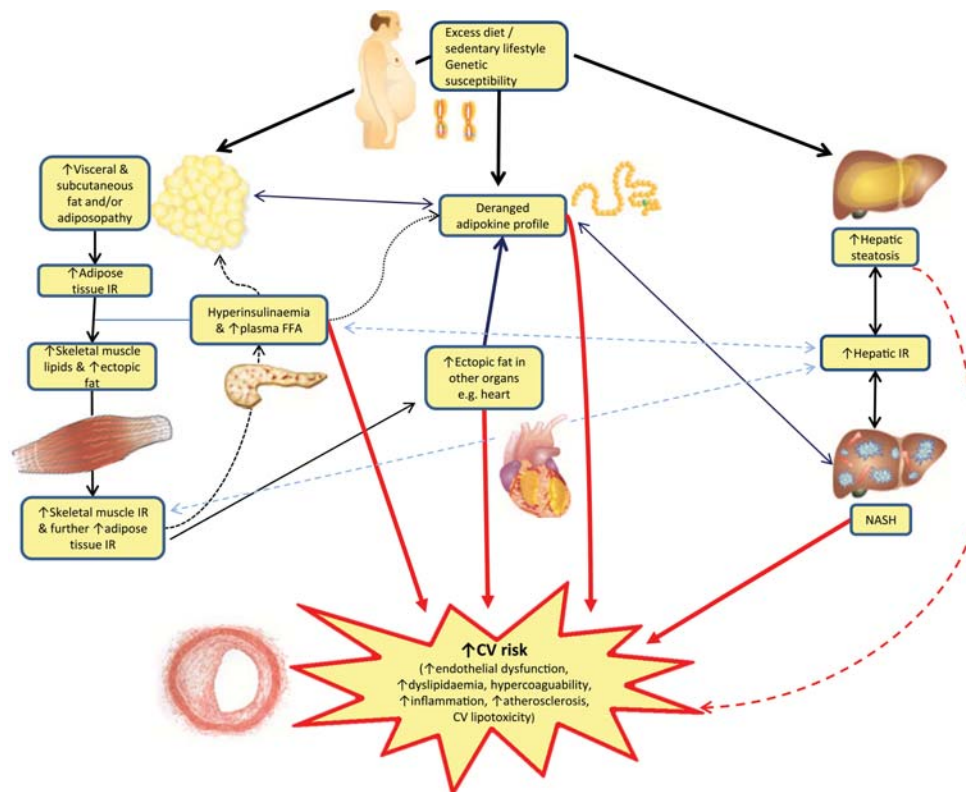

**Figure 4** Schematic diagram of the pathophysiological processes involved in non-alcoholic fatty liver disease leading to increased CV risk, highlighting the complex inter-relationships between visceral adipose tissue, adipocytokines, insulin resistance, ectopic fat accumulation and non-alcoholic fatty liver disease. FFA, free fatty acids.

support the key role of liver fat, rather than VAT, as a marker of obesity-related metabolic dysfunction and a strong predictor of multi-organ IR, which is independent of obesity, VAT, or plasma adipokine levels.<sup>80,99,100</sup> Despite these findings, adipose tissue is likely to still contribute to metabolic dysfunction as it is the specific characteristics of adipose tissue rather than the amount that is important. Accordingly, fat cell hypertrophy, macrophage infiltration of adipose tissue causing inflammation, increased adipose tissue lipolytic activity, and adipose tissue hypoxia are all associated with IR.<sup>101</sup> It is therefore plausible that the established link between obesity and CV outcome may in fact be mediated through both ectopic fat accumulation (i.e. liver and cardiac tissue) as well as the effects of adiposopathy or 'sick fat'.<sup>102</sup> This occurs when adipose tissue becomes chronically inflamed and releases proinflammatory adipokines and cytokines that ultimately contribute to atherosclerosis and CV disease. Therefore NAFLD can be considered a sensitive marker of pathological dysfunction of adipose tissue, which appears to be more relevant to CV outcome than simply adipose tissue mass.

## Epicardial fat

Given that NAFLD and excessive visceral abdominal fat represent abnormal ectopic fat deposition in the body, with associated VAT-secreted adipocytokines contributing to subclinical inflammation and atherosclerosis, what about the role of epicardial adipose

tissue (EAT), itself a visceral fat layer? Its anatomical location and proximity to the myocardium and adventitial layer of the coronary arteries, as well as sharing the same microcirculation, make it an ideal entity to exert a paracrine and vasocrine effect on the heart and its blood vessels.<sup>103</sup> Imaging studies have already shown that epicardial thickness or pericardial (epicardial and paracardial) fat volume correlate with the amount of VAT in both obese and non-obese subjects.<sup>104–107</sup> Furthermore, EAT thickness is also positively associated with the presence and severity of angiographic CAD,<sup>106,108,109</sup> and increased epicardial or pericardial fat volume measured by CT are each independently associated with the presence of CAC.<sup>110,111</sup> Importantly, adiponectin expression was found to be significantly lower in epicardial fat isolated from patients with severe CAD compared with those without CAD,<sup>112</sup> and pericardial fat volume also correlates with multiple markers of inflammation and oxidative stress,<sup>113</sup> thus signifying potential similarities in proinflammatory adipokine function between EAT and VAT.

Iacobellis *et al.*<sup>107</sup> have validated a simple echocardiographic method of quantifying EAT involving measurement over the anterior right ventricular wall in the parasternal view, showing an excellent correlation with magnetic resonance imaging-determined values. Furthermore, they have proposed EAT threshold values for cardiometabolic risk stratification,<sup>114</sup> having reported significant correlations of EAT with several anthropometric, CV, and



metabolic risk factors including IR.<sup>115,116</sup> Importantly, pericardial fat volume appears to independently predict major adverse cardiac event risk in asymptomatic subjects, even after adjusting for FRS, CAC score, and BMI.<sup>117</sup>

Weight reduction through exercise training or a low-calorie diet has been shown to decrease EAT thickness, as well as reduce VAT and increase insulin sensitivity.<sup>118,119</sup> Notably, improvement in LV diastolic function correlated better with EAT than waist circumference reduction.<sup>118</sup> Furthermore, increased epicardial fat has a significant negative correlation with cardiac index, and also correlates directly with intramyocardial TG levels.<sup>120</sup> Therefore, it remains unclear whether the LV dysfunction is due to lipotoxicity from excess FFA availability and subsequent oxidative stress, as well as the deleterious effects of increased LV mass, or secondary to adipokine-mediated myocardial inflammation and damage; or both.<sup>121</sup> However, it is likely that increased epicardial and myocardial fat both represent abnormal ectopic fat storage and may indeed be a marker of the cumulative effects of NAFLD and IR in the setting of pathological adiposity,<sup>120,122</sup> with consequent associated adverse CV outcome.<sup>123</sup>

## Inflammation

The liver is a key metabolic organ and central to the regulation of systemic inflammation. It is a generator as well as a target of various inflammatory and humoral factors (as summarized in see Supplementary material online, Table 7), working in concert and against secreted molecules from adipose tissue, macrophages, and endothelial cells in the context of CV disease initiation and progression.<sup>87,89,91</sup> Increasing severity of NAFLD likely represents worsening inflammatory and insulin-resistant states, with poorer cardiometabolic outcomes. High-sensitivity C-reactive protein, which is primarily produced by the liver and a marker of inflammation, is an independent predictor of CV events in several large studies.<sup>124</sup> Similarly, fibrinogen and plasminogen activator inhibitor-1 (PAI-1) also originate from hepatic tissue and are activators of the coagulation system, enhancing atherothrombosis. Targher et al. showed that biopsy-proven NASH patients had significantly higher levels of high-sensitivity C-reactive protein, fibrinogen, and PAI-1 activity compared with controls. Furthermore, the severity of NASH by liver histology correlated significantly with these CV risk biomarkers after adjustment for potential confounders, including IR and visceral adiposity.<sup>86</sup> A similar correlation was found for serum IL-6 levels, as well as serum and hepatic TNF- $\alpha$  in NASH patients.<sup>125</sup> Additionally, hepatic and plasma PAI-1 levels also correlate with the degree of hepatic steatosis.<sup>126</sup> These studies suggest that increased liver-secreted factors in NAFLD play an important role in the pathogenesis of systemic inflammation and atherosclerosis.

Nuclear factor kappa-B (NF- $\kappa$ B) is a hepatocellular transcription factor that plays a key role in intrahepatic inflammation. In rodent models, a high-fat diet results in hepatic steatosis and up-regulation of NF- $\kappa$ B activity, which leads to hepatic production of proinflammatory cytokines IL-6, IL-1 $\beta$ , and TNF- $\alpha$ , as well as activation of Kupffer cells and macrophages, possibly worsening hepatic inflammation.<sup>127</sup> This study also demonstrated that isolated hepatic inflammation in the absence of steatosis through selective activation of NF- $\kappa$ B, resulted in hepatic and skeletal muscle IR.

Hepatic steatosis can also induce hepatic inflammation through lipotoxicity and endoplasmic reticulum oxidative stress responses, as well as through mitochondrial dysfunction via increased oxidation of excess fatty acids.<sup>128</sup> Mitochondrial dysfunction and damage are associated with IR and atherosclerosis in several studies,<sup>97</sup> representing a plausible link between NAFLD and increased CV risk.

## Dyslipidaemia

Non-alcoholic fatty liver disease is characterized by an atherogenic lipid profile, consisting of high TG levels, low high-density lipoprotein (HDL) cholesterol, an increase in small, dense low-density lipoprotein (LDL) particles, increased very low-density lipoprotein (VLDL) cholesterol levels and elevated apolipoprotein B100 concentration. This type of atherogenic dyslipidaemia is strongly linked to adverse CV outcome.<sup>129</sup> The increased hepatic production of TG-rich VLDL provides a limited compensatory mechanism for reducing liver fat content.<sup>130</sup> However, this also results in abnormal HDL metabolism causing HDL reduction as well as compositional alterations. In fact, the amount of liver fat has a significant negative correlation with subfractions of HDL known to be athero-protective, which are reduced in NAFLD independently of peripheral insulin sensitivity.<sup>131</sup>

## Treatment of non-alcoholic fatty liver disease

Various therapeutic modalities for NAFLD have been postulated and trialled to date and a summary of these treatments, as well as each of its associated CV benefits and risks, are shown in Supplementary material online, Table 8.<sup>20,132–140</sup> For a more detailed overview, readers are encouraged to refer to recently published guidelines<sup>20</sup> as well as a meta-analysis of randomized trials for the treatment of NAFLD.<sup>132</sup> To summarize, there is currently no established pharmacological treatment for NAFLD, and lifestyle interventions such as increasing exercise, reducing dietary fat intake, and encouraging weight loss are the only recommended therapeutic strategies with proven benefit. From a cardiologist's perspective, lipid-lowering drugs (e.g. statins), insulin-sensitizers (e.g. thiazolidinediones, metformin) and anti-hypertensive agents have not as yet shown adequate added risk/benefit value in NAFLD over and above already established evidence-based guidelines for the individual treatment of dyslipidaemia, diabetes and hypertension. Given the increased CV risk associated with NAFLD attributed to its pro-atherogenic and pro-inflammatory states, it is perhaps surprising that statins, with their anti-atherosclerotic and pleiotropic (anti-oxidant, anti-inflammatory) effects, have thus far not shown a consistent benefit in NAFLD outcomes. One potential explanation for this could be that statins are also known to indirectly impair insulin sensitivity,<sup>141</sup> which may result in an overall net neutral effect in treating NAFLD. Other possible reasons could include inadequate trial durations to allow inflammatory changes to translate into beneficial clinical outcomes, or the enrolment of low-risk NAFLD cohorts. It is noteworthy that patients with hepatic steatosis have not been shown to be at increased risk for statin hepatotoxicity,<sup>142</sup> and

the Liver Expert Panel stated in a report in 2006 that statins can indeed be safely used in NAFLD and NASH, without the need for routine liver enzyme monitoring.<sup>143</sup> It follows therefore that cardiologists should not be concerned about initiating or continuing statins in patients with NAFLD, unless there is evidence of deranged synthetic liver function or decompensation. However, given the high prevalence of NAFLD in the general population, it would be prudent to routinely check baseline liver enzymes prior to commencing a statin, in order to prevent mistakenly attributing subsequently discovered elevated aminotransferase levels as statin-induced. General practitioners are often too quick to discontinue a statin when confronted with raised aminotransferase levels, when in fact there is no evidence that elevated levels in the absence of raised bilirubin (more than two times the upper limit of normal) reflect drug-induced liver injury.<sup>143</sup> With high-dose statin therapy proving beneficial in certain patient groups, e.g. acute coronary syndromes, one unresolved question is whether NAFLD patients with significantly raised baseline aminotransferase levels (i.e. more than three times the upper limit of normal) should be prescribed high doses at the outset, as these patients are at two to three times the risk of 'transaminitis' compared with moderate or low doses of statins. Until further data emerge proving its safety in this setting, we would recommend a cautious approach and commence statins at a lower dose, up-titrating according to clinical and biochemical response over several weeks. This would also be applicable to other CV drugs which are metabolized by the liver, e.g. amiodarone, nicotinic acid, calcium-channel blockers, and angiotensin-converting enzyme inhibitors, although the vast majority of NAFLD patients has normal synthetic liver function and tolerate these drugs very well.

*n*-3 long chain polyunsaturated fatty acids (PUFAs) represent a potentially viable pharmacological treatment option in NAFLD. This group of fatty acids has an excellent side-effect profile and in high dose is effective in reducing plasma TGs and FFA levels,<sup>136</sup> both increased in NAFLD and associated with increased CV risk. Animal studies have also shown *n*-3 PUFA to be negative regulators of hepatic lipogenesis and the inflammatory response, as well as improving insulin sensitivity.<sup>137</sup> Although preliminary human trials have already shown a beneficial effect of *n*-3 PUFA in treating NAFLD, they have been limited by small sample sizes, lack of randomization, or placebo arms.<sup>138–140</sup> Furthermore, no studies have yet examined the effect of reducing liver fat on proxy markers of CV risk. We are currently undertaking a randomized double-blind placebo-controlled trial in NAFLD patients to investigate the effect of prolonged treatment with high-dose *n*-3 PUFA (Omacor) on various proxy markers of CV risk and insulin sensitivity in relation to changes in liver fat quantified by MRS (clinicaltrials.gov NCT00760513).

Given the increased CV risk posed by NAFLD and the lack of any established therapeutic option at present, what should a cardiologist do when managing a cardiac patient with concomitant NAFLD? Any patient with documented NASH should be regarded as high risk given that CV mortality is increased approximately two-fold compared with the age-matched general population<sup>10</sup> and each individual CV risk factor should be controlled aggressively to reduce the overall risk. Measurement of fasting TGs, which is often overlooked, should also be undertaken as the TG/HDL

ratio appears to not only be a good predictor of IR, but also able to predict CV events independently.<sup>129,144</sup> Currently there are no established guidelines advising assessment or monitoring of simple measures of IR (e.g. waist circumference or TG/HDL ratio) as already exist for LDL-C or blood pressure measurements to optimize outcomes across all secondary care cardiac patients. Certainly in diabetics, a TG/HDL ratio of >2.5 should prompt consideration of adding in a fibrate, nicotinic acid, or *n*-3 PUFA treatment, in addition to statins and lifestyle modification advice.<sup>145</sup> More evidence for optimal thresholds in treating atherogenic dyslipidaemia, common in NAFLD, is needed in younger cohorts and the non-diabetic population.

## Conclusion and future directions

Non-alcoholic fatty liver disease is a marker of pathological ectopic fat accumulation combined with a low-grade chronic inflammatory state affecting adipose tissue and characterized almost universally by IR. This results in several deleterious pathophysiological processes including abnormal glucose, fatty acid, and lipoprotein metabolism, increased oxidative stress, deranged adipokine profile, worsening subclinical inflammation, hypercoagulability, endothelial dysfunction, and progression of atherosclerosis, ultimately leading to a dysfunctional cardiometabolic phenotype with potentially unfavourable CV outcome. There is convincing evidence that worsening grades of NAFLD contribute to progressive cardiometabolic risk, such that NASH represents a marker as well as a mediator of increased CV risk more than simple steatosis. Although future studies should quantify liver fat using MR spectroscopy as a gold-standard, there remains an issue over how to obtain reproducible non-invasive measures of hepatic necroinflammation and fibrosis to document NAFLD (or specifically, NASH) improvement, especially in randomized studies. Importantly, as steatohepatitis becomes more advanced, there is often a reduction in liver fat due to replacement of fat-laden hepatocytes with necrosed and fibrotic tissue, rendering liver fat measurements as a marker of NAFLD severity inaccurate. It is therefore imperative that future therapeutic trials in NAFLD also aim to include measurements of a range of validated cardiac, metabolic, and inflammatory biomarkers linked to clinical outcome, to serve as alternative objective measures of the change in NAFLD status and its associated cardiometabolic phenotype. This may also allow better risk prediction when adjusting for the effect of conventional risk factors in determining the true CV risk of NAFLD.

Importantly, current research evaluating easily accessible novel biomarkers or combined clinical and biochemical algorithms to accurately grade the severity of NAFLD tend to focus too narrowly on liver-based outcomes, ignoring the detrimental cardiometabolic effects which are often the main cause of adverse clinical events. Furthermore, the cardiometabolic consequences of NAFLD are remarkably heterogeneous in terms of its interplay with visceral adiposity, IR, and subclinical inflammation, and given that approximately a quarter of the general population are estimated to have this condition, a targeted strategy for pharmacological intervention would be challenging without outcome-based risk stratification. Therefore further research in this area is urgently needed to establish robust methods of predicting increased CV risk, as well as

identifying novel treatments to improve the adverse CV outcome currently associated with NAFLD.

## Supplementary material

Supplementary material is available at *European Heart Journal* online.

## Acknowledgements

We thank Adrian Bateman and Charles Peebles for help with Figures 1 and 3, respectively.

## Funding

L.S.B., P.C.C., and C.D.B. are all supported in part by the Southampton NIHR Biomedical Research Unit in Nutrition, Lifestyle, and Obesity.

**Conflict of interest:** C.D.B. is principal investigator of a randomized placebo-controlled trial investigating the effects of Omacor in NAFLD (NCT00760513).

## References

- Adamson JD. The liver as the organ of sanguification. *Can Med Assoc J* 1928;**18**: 147–150.
- Browning JD, Szczepaniak LS, Dobbins R, Nuremberg P, Horton JD, Cohen JC, Grundy SM, Hobbs HH. Prevalence of hepatic steatosis in an urban population in the United States: impact of ethnicity. *Hepatology* 2004;**40**:1387–1395.
- Byrne CD, Olufadi R, Bruce KD, Gagampang FR, Ahmed MH. Metabolic disturbances in non-alcoholic fatty liver disease. *Clin Sci (Lond)* 2009;**116**:539–564.
- Baumeister SE, Volzke H, Marschall P, John U, Schmidt CO, Flessa S, Alte D. Impact of fatty liver disease on health care utilization and costs in a general population: A 5-year observation. *Gastroenterology* 2008;**134**:85–94.
- Targher G, Bertolini L, Rodella S, Tessari R, Zenari L, Lippi G, Arcaro G. Non-alcoholic fatty liver disease is independently associated with an increased incidence of cardiovascular events in type 2 diabetic patients. *Diabetes Care* 2007;**30**:2119–2121.
- Hamaguchi M, Kojima T, Takeda N, Nagata C, Takeda J, Sarui H, Kawahito Y, Yoshida N, Suetsugu A, Kato T, Okuda J, Ida K, Yoshikawa T. Nonalcoholic fatty liver disease is a novel predictor of cardiovascular disease. *World J Gastroenterol* 2007;**13**:1579–1584.
- Haring R, Wallaschofski H, Nauck M, Dorr M, Baumeister SE, Volzke H. Ultra-sonographic hepatic steatosis increases prediction of mortality risk from elevated serum gamma-glutamyl transpeptidase levels. *Hepatology* 2009;**50**: 1403–1411.
- Soderberg C, Stal P, Asklund J, Glaumann H, Lindberg G, Marmur J, Hultcrantz R. Decreased survival of subjects with elevated liver function tests during a 28-year follow-up. *Hepatology* 2010;**51**:595–602.
- Adams LA, Lymp JF, St SJ, Sanderson SO, Lindor KD, Feldstein A, Angulo P. The natural history of nonalcoholic fatty liver disease: a population-based cohort study. *Gastroenterology* 2005;**129**:113–121.
- Ekstedt M, Franzen LE, Mathiesen UL, Thorelius L, Holmqvist M, Bodemar G, Kechagias S. Long-term follow-up of patients with NAFLD and elevated liver enzymes. *Hepatology* 2006;**44**:865–873.
- Neuschwander-Tetri BA, Caldwell SH. Nonalcoholic steatohepatitis: summary of an AASLD Single Topic Conference. *Hepatology* 2003;**37**:1202–1219.
- Tiniakos DG, Vos MB, Brunt EM. Nonalcoholic fatty liver disease: pathology and pathogenesis. *Annu Rev Pathol* 2010;**5**:145–171.
- Targher G, Arcaro G. Non-alcoholic fatty liver disease and increased risk of cardiovascular disease. *Atherosclerosis* 2007;**191**:235–240.
- Kottrönen A, Yki-Jarvinen H. Fatty liver. A novel component of the metabolic syndrome. *Arterioscler Thromb Vasc Biol* 2008;**28**:27–38.
- Mottillo S, Filion KB, Genest J, Joseph L, Pilote L, Poirier P, Rinfret S, Schiffrin EL, Eisenberg MJ. The metabolic syndrome and cardiovascular risk: a systematic review and meta-analysis. *J Am Coll Cardiol* 2010;**56**:1113–1132.
- Targher G, Marra F, Marchesini G. Increased risk of cardiovascular disease in non-alcoholic fatty liver disease: causal effect or epiphenomenon? *Diabetologia* 2008;**51**:1947–1953.
- Szczepaniak LS, Nuremberg P, Leonard D, Browning JD, Reingold JS, Grundy S, Hobbs HH, Dobbins RL. Magnetic resonance spectroscopy to measure hepatic triglyceride content: prevalence of hepatic steatosis in the general population. *Am J Physiol Endocrinol Metab* 2005;**288**:E462–E468.
- Kottrönen A, Westerbacka J, Bergholm R, Pietiläinen KH, Yki-Jarvinen H. Liver fat in the metabolic syndrome. *J Clin Endocrinol Metab* 2007;**92**:3490–3497.
- Mofrad P, Contos MJ, Haque M, Sargeant C, Fisher RA, Luketic VA, Sterling RK, Shiffman ML, Stravitz RT, Sanyal AJ. Clinical and histologic spectrum of non-alcoholic fatty liver disease associated with normal ALT values. *Hepatology* 2003;**37**:1286–1292.
- Ratzui V, Bellentani S, Cortez-Pinto H, Day C, Marchesini G. A position statement on NAFLD/NASH based on the EASL 2009 special conference. *J Hepatol* 2010;**53**:372–384.
- Kleiner DE, Brunt EM, Van NM, Behling C, Contos MJ, Cummings OW, Ferrell LD, Liu YC, Torbenson MS, Unalp-Arida A, Yeh M, McCullough AJ, Sanyal AJ. Design and validation of a histological scoring system for nonalcoholic fatty liver disease. *Hepatology* 2005;**41**:1313–1321.
- Ruttman E, Brant LJ, Concin H, Diem G, Rapp K, Ulmer H. Gamma-glutamyltransferase as a risk factor for cardiovascular disease mortality: an epidemiological investigation in a cohort of 163,944 Austrian adults. *Circulation* 2005;**112**:2130–2137.
- Wannamethee G, Ebrahim S, Shaper AG. Gamma-glutamyltransferase: determinants and association with mortality from ischemic heart disease and all causes. *Am J Epidemiol* 1995;**142**:699–708.
- Lee DH, Silventoinen K, Hu G, Jacobs DR Jr, Jousilahti P, Sundvall J, Tuomilehto J. Serum gamma-glutamyltransferase predicts non-fatal myocardial infarction and fatal coronary heart disease among 28,838 middle-aged men and women. *Eur Heart J* 2006;**27**:2170–2176.
- Fraser A, Harris R, Sattar N, Ebrahim S, Smith GD, Lawlor DA. Gamma-glutamyltransferase is associated with incident vascular events independently of alcohol intake: analysis of the British Women's Heart and Health Study and Meta-Analysis. *Arterioscler Thromb Vasc Biol* 2007;**27**:2729–2735.
- Schindhelm RK, Dekker JM, Nijpels G, Bouter LM, Stehouwer CD, Heine RJ, Diamant M. Alanine aminotransferase predicts coronary heart disease events: a 10-year follow-up of the Hoorn Study. *Atherosclerosis* 2007;**191**:391–396.
- Dunn W, Xu R, Wingard DL, Rogers C, Angulo P, Younossi ZM, Schwimmer JB. Suspected nonalcoholic fatty liver disease and mortality risk in a population-based cohort study. *Am J Gastroenterol* 2008;**103**:2263–2271.
- Yun KE, Shin CY, Yoon YS, Park HS. Elevated alanine aminotransferase levels predict mortality from cardiovascular disease and diabetes in Koreans. *Atherosclerosis* 2009;**205**:533–537.
- Schwimmer JB, Deutsch R, Behling C, Lavine JE. Fatty liver as a determinant of atherosclerosis. *Hepatology* 2005;**42**:610A.
- Lee DH, Blomhoff R, Jacobs DR Jr. Is serum gamma glutamyltransferase a marker of oxidative stress? *Free Radic Res* 2004;**38**:535–539.
- Lee DS, Evans JC, Robins SJ, Wilson PV, Albano I, Fox CS, Wang TJ, Benjamin EJ, D'Agostino RB, Vasan RS. Gamma glutamyl transferase and metabolic syndrome, cardiovascular disease, and mortality risk: the Framingham Heart Study. *Arterioscler Thromb Vasc Biol* 2007;**27**:127–133.
- Fraser A, Harris R, Sattar N, Ebrahim S, Davey SG, Lawlor DA. Alanine aminotransferase, gamma-glutamyltransferase, and incident diabetes: the British Women's Heart and Health Study and meta-analysis. *Diabetes Care* 2009;**32**: 741–750.
- Ioannou GN, Weiss NS, Boyko EJ, Mozaffarian D, Lee SP. Elevated serum alanine aminotransferase activity and calculated risk of coronary heart disease in the United States. *Hepatology* 2006;**43**:1145–1151.
- Sung KC, Ryan MC, Wilson AM. The severity of nonalcoholic fatty liver disease is associated with increased cardiovascular risk in a large cohort of non-obese Asian subjects. *Atherosclerosis* 2009;**203**:581–586.
- Gastaldello A, Kozakova M, Hojlund K, Flyvbjerg A, Favuzzi A, Mitrakou A, Balkau B. Fatty liver is associated with insulin resistance, risk of coronary heart disease, and early atherosclerosis in a large European population. *Hepatology* 2009;**49**:1537–1544.
- Villanova N, Moscattiello S, Ramilli S, Bugianesi E, Magalotti D, Vanni E, Zoli M, Marchesini G. Endothelial dysfunction and cardiovascular risk profile in non-alcoholic fatty liver disease. *Hepatology* 2005;**42**:473–480.
- Hudson S, Bhatia L, McCormick KG, Bateman A, Nash K, Curzen NP, Clough GF, Calder PC, Byrne CD. Non-alcoholic fatty liver disease severity is related to increased cardiovascular risk independently of hyperglycaemia and obesity. *Diabetologia* 2011;**54**:S110.
- Khot UN, Khot MB, Bajzer CT, Sapp SK, Ohman EM, Brenner SJ, Ellis SG, Lincoff AM, Topol EJ. Prevalence of conventional risk factors in patients with coronary heart disease. *JAMA* 2003;**290**:898–904.
- Dekker JM, Girman C, Rhodes T, Nijpels G, Stehouwer CD, Bouter LM, Heine RJ. Metabolic syndrome and 10-year cardiovascular disease risk in the Hoorn Study. *Circulation* 2005;**112**:666–673.

40. Budoff MJ, Achenbach S, Blumenthal RS, Carr JJ, Goldin JG, Greenland P, Guerci AD, Lima JA, Rader DJ, Rubin GD, Shaw LJ, Wiegers SE. Assessment of coronary artery disease by cardiac computed tomography: a scientific statement from the American Heart Association Committee on Cardiovascular Imaging and Intervention, Council on Cardiovascular Radiology and Intervention, and Committee on Cardiac Imaging, Council on Clinical Cardiology. *Circulation* 2006;**114**:1761–1791.
41. Chen CH, Nien CK, Yang CC, Yeh YH. Association between nonalcoholic fatty liver disease and coronary artery calcification. *Dig Dis Sci* 2010;**55**:1752–1760.
42. Akabame S, Hamaguchi M, Tomiyasu K, Tanaka M, Kobayashi-Takenaka Y, Nakano K, Oda Y, Yoshikawa T. Evaluation of vulnerable coronary plaques and non-alcoholic fatty liver disease (NAFLD) by 64-detector multislice computed tomography (MSCT). *Circ J* 2008;**72**:618–625.
43. Assy N, Djibre A, Farah R, Grosowski M, Marmor A. Presence of coronary plaques in patients with nonalcoholic fatty liver disease. *Radiology* 2010;**254**:393–400.
44. Moon JH, Park SH, Son HJ, Yoo KS, Hahn T, Park CK. The evaluation of association between nonalcoholic fatty liver disease and subclinical cardiovascular disease by using the coronary artery calcium score. *J Hepatol* 2009;**50**:S372.
45. Chalasani N, Deeg MA, Crabb DW. Systemic levels of lipid peroxidation and its metabolic and dietary correlates in patients with nonalcoholic steatohepatitis. *Am J Gastroenterol* 2004;**99**:1497–1502.
46. Targher G, Chonchol M, Miele L, Zoppini G, Pichiri I, Muggeo M. Nonalcoholic fatty liver disease as a contributor to hypercoagulation and thrombophilia in the metabolic syndrome. *Semin Thromb Hemost* 2009;**35**:277–287.
47. Qasim A, Mehta NN, Tadesse MG, Wolfe ML, Rhodes T, Girman C, Reilly MP. Adipokines, insulin resistance, and coronary artery calcification. *J Am Coll Cardiol* 2008;**52**:231–236.
48. Arslan U, Turkoglu S, Balcioglu S, Tavil Y, Karakan T, Cengel A. Association between nonalcoholic fatty liver disease and coronary artery disease. *Coron Artery Dis* 2007;**18**:433–436.
49. Acikel M, Sunay S, Koplay M, Gundogdu F, Karakelleoglu S. Evaluation of ultrasonographic fatty liver and severity of coronary atherosclerosis, and obesity in patients undergoing coronary angiography. *Anadolu Kardiyol Derg* 2009;**9**:273–279.
50. Mirbagheri SA, Rashidi A, Abdi S, Saedi D, Abouzari M. Liver: an alarm for the heart? *Liver Int* 2007;**27**:891–894.
51. Alper AT, Hasdemir H, Sahin S, Onturk E, Akyol A, Nurkalem Z, Cakmak N, Erdinler I, Gurkan K. The relationship between nonalcoholic fatty liver disease and the severity of coronary artery disease in patients with metabolic syndrome. *Turk Kardiyol Dern Ars* 2008;**36**:376–381.
52. Pijls NH, van SP, Manoharan G, Boersma E, Bech JW, van't Veer M, Bar F, Hoorntje J, Koolen J, Wijns W, de BB. Percutaneous coronary intervention of functionally nonsignificant stenosis: 5-year follow-up of the DEFER Study. *J Am Coll Cardiol* 2007;**49**:2105–2111.
53. Tonino PA, Fearon WF, de BB, Oldroyd KG, Leesar MA, Ver Lee PN, Maccarthy PA, van't Veer M, Pijls NH. Angiographic vs. functional severity of coronary artery stenoses in the FAME study fractional flow reserve vs. angiography in multivessel evaluation. *J Am Coll Cardiol* 2010;**55**:2816–2821.
54. Lorenz MW, Markus HS, Bots ML, Rosvall M, Sitzer M. Prediction of clinical cardiovascular events with carotid intima-media thickness: a systematic review and meta-analysis. *Circulation* 2007;**115**:459–467.
55. O'Leary DH, Polak JF, Kronmal RA, Manolio TA, Burke GL, Wolfson SK Jr. Carotid-artery intima and media thickness as a risk factor for myocardial infarction and stroke in older adults. Cardiovascular Health Study Collaborative Research Group. *N Engl J Med* 1999;**340**:14–22.
56. Volzke H, Robinson DM, Kleine V, Deutscher R, Hoffmann W, Ludemann J, Schminke U, Kessler C, John U. Hepatic steatosis is associated with an increased risk of carotid atherosclerosis. *World J Gastroenterol* 2005;**11**:1848–1853.
57. Targher G, Bertolini L, Padovani R, Poli F, Scala L, Tessari R, Zenari L, Falezza G. Increased prevalence of cardiovascular disease in type 2 diabetic patients with non-alcoholic fatty liver disease. *Diabet Med* 2006;**23**:403–409.
58. Targher G, Bertolini L, Padovani R, Rodella S, Zoppini G, Zenari L, Cigolini M, Falezza G, Arcaro G. Relations between carotid artery wall thickness and liver histology in subjects with nonalcoholic fatty liver disease. *Diabetes Care* 2006;**29**:1325–1330.
59. Fracanzani AL, Burdick L, Raselli S, Pedotti P, Grigore L, Santorelli G, Valenti L, Maraschi A, Catapano A, Fargion S. Carotid artery intima-media thickness in nonalcoholic fatty liver disease. *Am J Med* 2008;**121**:72–78.
60. Caserta CA, Pendino GM, Amante A, Vacalebre C, Fiorillo MT, Surace P, Messineo A, Surace M, Alicante S, Cotichini R, Zuin M, Rosmini F, Mele A, Marcucci F. Cardiovascular risk factors, nonalcoholic fatty liver disease, and carotid artery intima-media thickness in an adolescent population in southern Italy. *Am J Epidemiol* 2010;**171**:1195–1202.
61. Kim HC, Kim DJ, Huh KB. Association between nonalcoholic fatty liver disease and carotid intima-media thickness according to the presence of metabolic syndrome. *Atherosclerosis* 2009;**204**:521–525.
62. Sookoian S, Pirola CJ. Non-alcoholic fatty liver disease is strongly associated with carotid atherosclerosis: a systematic review. *J Hepatol* 2008;**49**:600–607.
63. McKimmie RL, Daniel KR, Carr JJ, Bowden DW, Freedman BI, Register TC, Hsu FC, Lohman KK, Weinberg RB, Wagenknecht LE. Hepatic steatosis and subclinical cardiovascular disease in a cohort enriched for type 2 diabetes: the Diabetes Heart Study. *Am J Gastroenterol* 2008;**103**:3029–3035.
64. Petit JM, Guiu B, Terriat B, Loffroy R, Robin I, Petit V, Bouillet B, Brindisi MC, Duvalard L, Hillon P, Cercueil JP, Verges B. Nonalcoholic fatty liver is not associated with carotid intima-media thickness in type 2 diabetic patients. *J Clin Endocrinol Metab* 2009;**94**:4103–4106.
65. Juurinen L, Tiikkainen M, Hakkinen AM, Hakkarainen A, Yki-Jarvinen H. Effects of insulin therapy on liver fat content and hepatic insulin sensitivity in patients with type 2 diabetes. *Am J Physiol Endocrinol Metab* 2007;**292**:E829–E835.
66. Wyman RA, Mays ME, McBride PE, Stein JH. Ultrasound-detected carotid plaque as a predictor of cardiovascular events. *Vasc Med* 2006;**11**:123–130.
67. Chinali M, Devereux RB, Howard BV, Roman MJ, Bella JN, Liu JE, Resnick HE, Lee ET, Best LG, de SG. Comparison of cardiac structure and function in American Indians with and without the metabolic syndrome (the Strong Heart Study). *Am J Cardiol* 2004;**93**:40–44.
68. Ferrara LA, Cardoni O, Mancini M, Zanchetti A. Metabolic syndrome and left ventricular hypertrophy in a general population. Results from the Gubbio Study. *J Human Hypertens* 2007;**21**:795–801.
69. Goland S, Shimoni S, Zornitzki T, Knobler H, Azoulay O, Lutaty G, Melzer E, Orr A, Caspi A, Malnick S. Cardiac abnormalities as a new manifestation of non-alcoholic fatty liver disease: echocardiographic and tissue Doppler imaging assessment. *J Clin Gastroenterol* 2006;**40**:949–955.
70. Fallo F, Dalla PA, Sonino N, Lupia M, Tona F, Federspil G, Ermani M, Catena C, Soardo G, Di PL, Bernardi S, Bertolotto M, Pinamonti B, Fabris B, Secchi LA. Non-alcoholic fatty liver disease is associated with left ventricular diastolic dysfunction in essential hypertension. *Nutr Metab Cardiovasc Dis* 2009;**19**:646–653.
71. Fotbolcu H, Yakar T, Duman D, Karaahmet T, Tigen K, Cevik C, Kurtoglu U, Dindar I. Impairment of the left ventricular systolic and diastolic function in patients with non-alcoholic fatty liver disease. *Cardiol J* 2010;**17**:457–463.
72. Yilmaz Y, Kurt R, Yonal O, Polat N, Celikel CA, Gurdal A, Ofiaz H, Ozdogan O, Imeryuz N, Kalayci C, Avsar E. Coronary flow reserve is impaired in patients with nonalcoholic fatty liver disease: association with liver fibrosis. *Atherosclerosis* 2010;**211**:182–186.
73. Witteles RM, Fowler MB. Insulin-resistant cardiomyopathy clinical evidence, mechanisms, and treatment options. *J Am Coll Cardiol* 2008;**51**:93–102.
74. Schindhelm RK, Diamant M, Bakker SJ, van Dijk RA, Scheffer PG, Teerlink T, Kostense PJ, Heine RJ. Liver alanine aminotransferase, insulin resistance and endothelial dysfunction in normotriglyceridaemic subjects with type 2 diabetes mellitus. *Eur J Clin Invest* 2005;**35**:369–374.
75. Lautamaki R, Borra R, Iozzo P, Komu M, Lehtimaki T, Salmi M, Jalkanen S, Airaksinen KE, Knuuti J, Parkkola R, Nuutila P. Liver steatosis coexists with myocardial insulin resistance and coronary dysfunction in patients with type 2 diabetes. *Am J Physiol Endocrinol Metab* 2006;**291**:E282–E290.
76. Perseghin G, Lattuada G, De CF, Esposito A, Belloni E, Ntali G, Ragogna F, Canu T, Scifo P, Del MA, Luzi L. Increased mediastinal fat and impaired left ventricular energy metabolism in young men with newly found fatty liver. *Hepatology* 2008;**47**:51–58.
77. Peterson LR. Obesity and insulin resistance: effects on cardiac structure, function, and substrate metabolism. *Curr Hypertens Rep* 2006;**8**:451–456.
78. Korenblat KM, Fabbrini E, Mohammed BS, Klein S. Liver, muscle, and adipose tissue insulin action is directly related to intrahepatic triglyceride content in obese subjects. *Gastroenterology* 2008;**134**:1369–1375.
79. Coutinho M, Gerstein HC, Wang Y, Yusuf S. The relationship between glucose and incident cardiovascular events. A metaregression analysis of published data from 20 studies of 95,783 individuals followed for 12.4 years. *Diabetes Care* 1999;**22**:233–240.
80. Fabbrini E, Magkos F, Mohammed BS, Pietka T, Abumrad NA, Patterson BW, Okunade A, Klein S. Intrahepatic fat, not visceral fat, is linked with metabolic complications of obesity. *Proc Natl Acad Sci USA* 2009;**106**:15430–15435.
81. Donahue RP, Abbott RD, Bloom E, Reed DM, Yano K. Central obesity and coronary heart disease in men. *Lancet* 1987;**1**:821–824.
82. Despres JP, Lemieux I, Bergeron J, Pibarot P, Mathieu P, Larose E, Rodes-Cabau J, Bertrand OF, Poirier P. Abdominal obesity and the metabolic syndrome: contribution to global cardiometabolic risk. *Arterioscler Thromb Vasc Biol* 2008;**28**:1039–1049.
83. Bjorntorp P. 'Portal' adipose tissue as a generator of risk factors for cardiovascular disease and diabetes. *Arteriosclerosis* 1990;**10**:493–496.



84. Pirro M, Mauriege P, Tchernof A, Cantin B, Dagenais GR, Despres JP, Lamarche B. Plasma free fatty acid levels and the risk of ischemic heart disease in men: prospective results from the Quebec Cardiovascular Study. *Atherosclerosis* 2002;**160**:377–384.
85. Pilz S, Scharnagl H, Tiran B, Seelhorst U, Wellnitz B, Boehm BO, Schaefer JR, Marz W. Free fatty acids are independently associated with all-cause and cardiovascular mortality in subjects with coronary artery disease. *J Clin Endocrinol Metab* 2006;**91**:2542–2547.
86. Targher G, Bertolini L, Rodella S, Lippi G, Franchini M, Zoppini G, Muggeo M, Day CP. NASH predicts plasma inflammatory biomarkers independently of visceral fat in men. *Obesity (Silver Spring)* 2008;**16**:1394–1399.
87. Wang Z, Nakayama T. Inflammation, a link between obesity and cardiovascular disease. *Mediators Inflamm* 2010;**2010**:535918.
88. Lafontan M, Girard J. Impact of visceral adipose tissue on liver metabolism. Part I: heterogeneity of adipose tissue and functional properties of visceral adipose tissue. *Diabetes Metab* 2008;**34**:317–327.
89. de FS, Mozaffarian D. The perfect storm: obesity, adipocyte dysfunction, and metabolic consequences. *Clin Chem* 2008;**54**:945–955.
90. Tilg H, Moschen AR. Inflammatory mechanisms in the regulation of insulin resistance. *Mol Med* 2008;**14**:222–231.
91. Bakhai A. Adipokines—targeting a root cause of cardiometabolic risk. *QJM* 2008;**101**:767–776.
92. Tsochatzis EA, Papatheodoridis GV, Archimandritis AJ. Adipokines in non-alcoholic steatohepatitis: from pathogenesis to implications in diagnosis and therapy. *Mediators Inflamm* 2009;**2009**:831670.
93. Tai CC, Ding ST. N-3 polyunsaturated fatty acids regulate lipid metabolism through several inflammation mediators: mechanisms and implications for obesity prevention. *J Nutr Biochem* 2010;**21**:357–363.
94. Wu H, Jia W, Bao Y, Lu J, Zhu J, Wang R, Chen Y, Xiang K. Serum retinol binding protein 4 and nonalcoholic fatty liver disease in patients with type 2 diabetes mellitus. *Diabetes Res Clin Pract* 2008;**79**:185–190.
95. Van Gaal LF, Mertens IL, De Block CE. Mechanisms linking obesity with cardiovascular disease. *Nature* 2006;**444**:875–880.
96. Berg AH, Scherer PE. Adipose tissue, inflammation, and cardiovascular disease. *Circ Res* 2005;**96**:939–949.
97. Semenkovich CF. Insulin resistance and atherosclerosis. *J Clin Invest* 2006;**116**:1813–1822.
98. Garg A. Acquired and inherited lipodystrophies. *N Engl J Med* 2004;**350**:1220–1234.
99. Sung KC, Ryan MC, Kim BS, Cho YK, Kim BI, Reaven GM. Relationships between estimates of adiposity, insulin resistance, and nonalcoholic fatty liver disease in a large group of nondiabetic Korean adults. *Diabetes Care* 2007;**30**:2113–2118.
100. Petersen KF, Dufour S, Savage DB, Bilz S, Solomon G, Yonemitsu S, Cline GW, Befroy D, Zeman L, Kahn BB, Papademetris X, Rothman DL, Shulman GI. Inaugural article: the role of skeletal muscle insulin resistance in the pathogenesis of the metabolic syndrome. *Proc Natl Acad Sci* 2007;**104**:12587–12594.
101. Magkos F, Fabbri E, Mohammed BS, Patterson BW, Klein S. Increased whole-body adiposity without a concomitant increase in liver fat is not associated with augmented metabolic dysfunction. *Obesity (Silver Spring)* 2010;**18**:1510–1515.
102. Bays HE. 'Sick fat,' metabolic disease, and atherosclerosis. *Am J Med* 2009;**122**:S26–S37.
103. Sacks HS, Fain JN. Human epicardial adipose tissue: a review. *Am Heart J* 2007;**153**:907–917.
104. Iacobellis G, Ribaudo MC, Assael F, Vecchi E, Tiberti C, Zappaterreno A, Di Mario U, Leonetti F. Echocardiographic epicardial adipose tissue is related to anthropometric and clinical parameters of metabolic syndrome: a new indicator of cardiovascular risk. *J Clin Endocrinol Metab* 2003;**88**:5163–5168.
105. Wheeler GL, Shi R, Beck SR, Langefeld CD, Lenchik L, Wagenknecht LE, Freedman BI, Rich SS, Bowden DW, Chen MY, Carr JJ. Pericardial and visceral adipose tissues measured volumetrically with computed tomography are highly associated in type 2 diabetic families. *Invest Radiol* 2005;**40**:97–101.
106. Ahn SG, Lim HS, Joe DY, Kang SJ, Choi BJ, Choi SY, Yoon MH, Hwang GS, Tahk SJ, Shin JH. Relationship of epicardial adipose tissue by echocardiography to coronary artery disease. *Heart* 2008;**94**:e7.
107. Iacobellis G, Assael F, Ribaudo MC, Zappaterreno A, Alessi G, Di MU, Leonetti F. Epicardial fat from echocardiography: a new method for visceral adipose tissue prediction. *Obes Res* 2003;**11**:304–310.
108. Jeong JW, Jeong MH, Yun KH, Oh SK, Park EM, Kim YK, Rhee SJ, Lee EM, Lee J, Yoo NJ, Kim NH, Park JC. Echocardiographic epicardial fat thickness and coronary artery disease. *Circ J* 2007;**71**:536–539.
109. Park JS, Ahn SG, Hwang JW, Lim HS, Choi BJ, Choi SY, Yoon MH, Hwang GS, Tahk SJ, Shin JH. Impact of body mass index on the relationship of epicardial adipose tissue to metabolic syndrome and coronary artery disease in an Asian population. *Cardiovasc Diabetol* 2010;**9**:29.
110. Sarin S, Wenger C, Marwaha A, Qureshi A, Go BD, Woomert CA, Clark K, Nassef LA, Shirani J. Clinical significance of epicardial fat measured using cardiac multislice computed tomography. *Am J Cardiol* 2008;**102**:767–771.
111. Rosito GA, Massaro JM, Hoffmann U, Ruberg FL, Mahabadi AA, Vasan RS, O'Donnell CJ, Fox CS. Pericardial fat, visceral abdominal fat, cardiovascular disease risk factors, and vascular calcification in a community-based sample: the Framingham Heart Study. *Circulation* 2008;**117**:605–613.
112. Iacobellis G, Pistilli D, Gucciardo M, Leonetti F, Miraldi F, Brancaccio G, Gallo P, di Gioia CR. Adiponectin expression in human epicardial adipose tissue *in vivo* is lower in patients with coronary artery disease. *Cytokine* 2005;**29**:251–255.
113. Tadros TM, Massaro JM, Rosito GA, Hoffmann U, Vasan RS, Larson MG, Keaney JF Jr, Lipinska I, Meigs JB, Kathiresan S, O'Donnell CJ, Fox CS, Benjamin EJ. Pericardial fat volume correlates with inflammatory markers: the Framingham Heart Study. *Obesity (Silver Spring)* 2010;**18**:1039–1045.
114. Iacobellis G, Willens HJ, Barbaro G, Sharma AM. Threshold values of high-risk echocardiographic epicardial fat thickness. *Obesity (Silver Spring)* 2008;**16**:887–892.
115. Iacobellis G, Leonetti F. Epicardial adipose tissue and insulin resistance in obese subjects. *J Clin Endocrinol Metab* 2005;**90**:6300–6302.
116. Iacobellis G, Sharma AM. Epicardial adipose tissue as new cardio-metabolic risk marker and potential therapeutic target in the metabolic syndrome. *Curr Pharm Des* 2007;**13**:2180–2184.
117. Cheng YY, Dey D, Tamarappoo B, Nakazato R, Gransar H, Miranda-Peats R, Ramesh A, Wong ND, Shaw LJ, Slomka PJ, Berman DS. Pericardial fat burden on ECG-gated noncontrast CT in asymptomatic patients who subsequently experience adverse cardiovascular events. *JACC Cardiovasc Imaging* 2010;**3**:352–360.
118. Iacobellis G, Singh N, Wharton S, Sharma AM. Substantial changes in epicardial fat thickness after weight loss in severely obese subjects. *Obesity (Silver Spring)* 2008;**16**:1693–1697.
119. Kim MK, Tomita T, Kim MJ, Sasai H, Maeda S, Tanaka K. Aerobic exercise training reduces epicardial fat in obese men. *J Appl Physiol* 2009;**106**:5–11.
120. Kankaanpää M, Lehto HR, Parkka JP, Komu M, Viljanen A, Ferrannini E, Knuuti J, Nuutila P, Parkkola R, Iozzo P. Myocardial triglyceride content and epicardial fat mass in human obesity: relationship to left ventricular function and serum free fatty acid levels. *J Clin Endocrinol Metab* 2006;**91**:4689–4695.
121. Sacks HS. Weight loss in obesity reduces epicardial fat thickness; so what? *J Appl Physiol* 2009;**106**:1–2.
122. Iacobellis G, Pellicelli AM, Grisorio B, Barbarini G, Leonetti F, Sharma AM, Barbaro G. Relation of epicardial fat and alanine aminotransferase in subjects with increased visceral fat. *Obesity (Silver Spring)* 2008;**16**:179–183.
123. Iacobellis G, Lonn E, Lamy A, Singh N, Sharma AM. Epicardial fat thickness and coronary artery disease correlate independently of obesity. *Int J Cardiol* 2011;**146**:452–454.
124. Lavie CJ, Milani RV, Verma A, O'Keefe JH. C-reactive protein and cardiovascular diseases—is it ready for primetime? *Am J Med Sci* 2009;**338**:486–492.
125. Dowman JK, Tomlinson JW, Newsome PN. Pathogenesis of non-alcoholic fatty liver disease. *QJM* 2010;**103**:71–83.
126. Alessi MC, Bastelica D, Mavri A, Morange P, Berthet B, Grino M, Juhan-Vague I. Plasma PAI-1 levels are more strongly related to liver steatosis than to adipose tissue accumulation. *Arterioscler Thromb Vasc Biol* 2003;**23**:1262–1268.
127. Cai D, Yuan M, Frantz DF, Melendez PA, Hansen L, Lee J, Shoelson SE. Local and systemic insulin resistance resulting from hepatic activation of IKK-beta and NF-kappaB. *Nat Med* 2005;**11**:183–190.
128. Shoelson SE, Lee J, Goldfine AB. Inflammation and insulin resistance. *J Clin Invest* 2006;**116**:1793–1801.
129. Gaziano JM, Hennekens CH, O'Donnell CJ, Breslow JL, Buring JE. Fasting triglycerides, high-density lipoprotein, and risk of myocardial infarction. *Circulation* 1997;**96**:2520–2525.
130. Fabbri E, Sullivan S, Klein S. Obesity and nonalcoholic fatty liver disease: biochemical, metabolic, and clinical implications. *Hepatology* 2010;**51**:679–689.
131. Kantartzis K, Rittig K, Cegan A, Machann J, Schick F, Balletshofer B, Fritzsche A, Schleicher E, Haring HU, Stefan N. Fatty liver is independently associated with alterations in circulating HDL2 and HDL3 subfractions. *Diabetes Care* 2008;**31**:366–368.
132. Musso G, Gambino R, Cassader M, Pagano G. A meta-analysis of randomized trials for the treatment of nonalcoholic fatty liver disease. *Hepatology* 2010;**52**:79–104.
133. Ahmed MH, Byrne CD. Current treatment of non-alcoholic fatty liver disease. *Diabetes Obes Metab* 2009;**11**:188–195.
134. Targher G, Bellis A, Fornengo P, Ciaravella MF, Pichiri I, Cavallo PP, Trimarco B, Marchesini G. Prevention and treatment of nonalcoholic fatty liver disease. *Dig Liver Dis* 2010;**42**:331–340.
135. Saravanan P, Davidson NC, Schmidt EB, Calder PC. Cardiovascular effects of marine omega-3 fatty acids. *Lancet* 2010;**376**:540–550.

136. Sirtori CR, Crepaldi G, Manzato E, Mancini M, Rivellese A, Paoletti R, Pazzucconi F, Pamparana F, Stragliotto E. One-year treatment with ethyl esters of n-3 fatty acids in patients with hypertriglyceridemia and glucose intolerance: reduced triglyceridemia, total cholesterol and increased HDL-C without glycemic alterations. *Atherosclerosis* 1998;**137**:419–427.
137. Masterton GS, Plevris JN, Hayes PC. Review article: omega-3 fatty acids: a promising novel therapy for non-alcoholic fatty liver disease. *Aliment Pharmacol Ther* 2010;**31**:679–692.
138. Capanni M, Calella F, Biagini MR, Genise S, Raimondi L, Bedogni G, Svegliati-Baroni G, Sofi F, Milani S, Abbate R, Surrenti C, Casini A. Prolonged n-3 polyunsaturated fatty acid supplementation ameliorates hepatic steatosis in patients with non-alcoholic fatty liver disease: a pilot study. *Aliment Pharmacol Ther* 2006;**23**:1143–1151.
139. Spadaro L, Magliocco O, Spampinato D, Piro S, Oliveri C, Alagona C, Papa G, Rabuazzo AM, Purrello F. Effects of n-3 polyunsaturated fatty acids in subjects with nonalcoholic fatty liver disease. *Dig Liver Dis* 2008;**40**:194–199.
140. Tanaka N, Sano K, Horiuchi A, Tanaka E, Kiyosawa K, Aoyama T. Highly purified eicosapentaenoic acid treatment improves nonalcoholic steatohepatitis. *J Clin Gastroenterol* 2008;**42**:413–418.
141. Bhatia L, Byrne CD. There is a slight increase in incident diabetes risk with the use of statins, but benefits likely outweigh any adverse effects in those with moderate-to-high cardiovascular risk. *Evid Based Med* 2010;**15**:84–85.
142. Browning JD. Statins and hepatic steatosis: perspectives from the Dallas Heart Study. *Hepatology* 2006;**44**:466–471.
143. Cohen DE, Anania FA, Chalasani N. An assessment of statin safety by hepatologists. *Am J Cardiol* 2006;**97**:77C–81C.
144. McLaughlin T, Reaven G, Abbasi F, Lamendola C, Saad M, Waters D, Simon J, Krauss RM. Is there a simple way to identify insulin-resistant individuals at increased risk of cardiovascular disease? *Am J Cardiol* 2005;**96**:399–404.
145. Ginsberg HN, Elam MB, Lovato LC, Crouse JR III, Leiter LA, Linz P, Friedewald WT, Buse JB, Gerstein HC, Probstfield J, Grimm RH, Ismail-Beigi F, Bigger JT, Goff DC Jr, Cushman WC, Simons-Morton DG, Byington RP. Effects of combination lipid therapy in type 2 diabetes mellitus. *N Engl J Med* 2010;**362**:1563–1574.
146. Wells GA, Shea B, Peterson J, Welch V, Losos M, Tugwell P. The Newcastle-Ottawa Scale (NOS) for assessing the quality of nonrandomised studies in meta-analyses. [http://www.ohrica/programs/clinical\\_epidemiology/oxford.asp](http://www.ohrica/programs/clinical_epidemiology/oxford.asp) 2011.
147. Stroup DF, Berlin JA, Morton SC, Olkin I, Williamson GD, Rennie D, Moher D, Becker BJ, Sipe TA, Thacker SB. Meta-analysis of observational studies in epidemiology: a proposal for reporting. Meta-analysis of observational studies in epidemiology (MOOSE) group. *JAMA* 2000;**283**:2008–2012.
